# Supplementary material
Source: PubMed Central journal article supplement (PMC8855603)
Supplement: 12916_2022_2290_MOESM1_ESM.pdf [file 12916_2022_2290_MOESM1_ESM.pdf]

## ADDITIONAL FILE 1 COVID-VIT-D

**A single oral dose bolus of 100,000 IU of cholecalciferol at hospital admission did not improve outcomes in the COVID-19 disease. The COVID-VIT-D: A randomized multicentre international clinical trial.**

### TABLE OF CONTENTS

- **Table S1.** Variables collected in the COVID-VIT-D trial.
- **Table S2.** Symptoms at discharge.
- **Table S3.** Biochemical parameters at discharge.
- **Table S4.** Demographic, comorbidities, and serum calcidiol categories at hospital admission.
- **Table S5.** Relevant biochemical parameters and serum calcidiol categories at hospital admission.
- **Table S6.** Relevant biochemical parameters and serum calcidiol categories at hospital admission in age-matched patients.
- **Table S7.** Pulmonary involvement at admission and outcomes according to serum calcidiol categories.
- **Table S8.** Types and number of drugs received during the hospitalization and serum calcidiol categories at hospital admission.
- **Table S9.** Demographic, comorbidities, and serum calcidiol categories at admission in age-matched patients.
- **Table S10.** Types and number of drugs received during the hospitalization and serum calcidiol categories at hospital admission in age-matched patients.
- **Table S11.** Relevant biochemical parameters and serum calcidiol categories at hospital admission in the control group (No cholecalciferol).
- **Table S12.** Types and number of drugs received during the hospitalization and serum calcidiol categories at hospital admission in the control group (No cholecalciferol).
- **Table S13.** Pulmonary involvement at admission and outcomes according to initial serum calcidiol categories in the control group (No cholecalciferol).

**Table S1. Variables collected in the COVID-VIT-D trial.**

Demographic and comorbidities

|                         |                                 |
|-------------------------|---------------------------------|
| Date of birth           | Diabetes (yes/no)               |
| Gender (male/female)    | Cardiovascular disease (yes/no) |
| Height (cm)             | Hypertension (yes/no)           |
| Weight (kg)             | Asthma (yes/no)                 |
| Smoking (yes/no)        | COPD (yes/no)                   |
| ACEIs-ARBs use (yes/no) |                                 |

Hospitalization (clinical and evolutive data)

|                             |                       |
|-----------------------------|-----------------------|
| Hospital admission date     | Symptoms onset date   |
| Hospital discharge date     | Symptoms at admission |
| ICU admission date          | Symptoms at discharge |
| ICU discharge date          | Death date            |
| Positive PCR SARS-COV2 date |                       |

Biochemical and imaging parameters at admission and discharge

|                       |                                         |
|-----------------------|-----------------------------------------|
| Calcidiol (ng/mL)     | Leucocytes (No./ $\mu$ L)               |
| CRP (mg/dL)           | Interleukin-6 (pg/mL)                   |
| Creatinine (mg/dL)    | Ferritin (ng/mL)                        |
| Albumin (g/L)         | Bilirubin (mg/dL)                       |
| Haemoglobin (g/dL)    | Troponin (ng/L)                         |
| LDH (U/L)             | Calcium (mg/dL)                         |
| D-dimer (ng/mL)       | Phosphate (mg/dL)                       |
| Procalcitonin (ng/mL) | X-Ray/CAT (positive/ doubtful/negative) |

Symptoms at admission/discharge

|                   |                    |
|-------------------|--------------------|
| Cough (yes/no)    | Anosmia (yes/no)   |
| Fever (yes/no)    | Diarrhoea (yes/no) |
| Weakness (yes/no) | Ageusia (yes/no)   |
| Headache (yes/no) | Others (yes/no)    |
| Dyspnoea (yes/no) |                    |

Types of drugs received during the hospitalization

|                              |                                        |
|------------------------------|----------------------------------------|
| Cholecalciferol (yes/no)     | Enoxaparin (yes/no)                    |
| Azithromycin (yes/no)        | Methylprednisolone (yes/no)            |
| Ceftriaxone (yes/no)         | Dexamethasone (yes/no)                 |
| Hydroxychloroquine (yes/no)  | Interferon $\beta$ (yes/no)            |
| Lopinavir/ritonavir (yes/no) | SARS-COV2 convalescent plasma (yes/no) |
| Tocilizumab (yes/no)         |                                        |

ACEIs-ARBs: angiotensin converting enzyme inhibitors -angiotensin receptor blockers

COPD: Chronic obstructive pulmonary

CRP: C-reactive protein

CAT: Computed axial tomography

**Table S2. Symptoms at discharge.**

| Symptoms                         | Cholecalciferol group |                | Control group |                |
|----------------------------------|-----------------------|----------------|---------------|----------------|
|                                  | n                     | n=274          | n             | n=269          |
| Fever, n (%)                     | 234                   | 8 (3.4)        | 237           | 18 (7.6)       |
| Cough, n (%)                     | 234                   | 62 (26.5)      | 237           | 74 (31.2)      |
| Weakness, n (%)                  | 234                   | 34 (14.5)      | 237           | 38 (16.0)      |
| Dyspnoea, n (%)                  | 234                   | 33 (14.1)      | 237           | 31 (13.1)      |
| Headache, n (%)                  | 234                   | 11 (4.7)       | 237           | 18 (7.6)       |
| Anosmia, n (%)                   | 234                   | 11 (4.7)       | 237           | 9 (3.8)        |
| Diarrhoea, n (%)                 | 234                   | 2 (0.9)        | 237           | 6 (2.5)        |
| Ageusia, n (%)                   | 234                   | 2 (0.9)        | 237           | 5 (2.1)        |
| Other, n (%)                     | 234                   | 4 (1.7)        | 237           | 8 (3.4)        |
| Number of symptoms, median [IQR] | 234                   | 0.0 [0.0, 1.0] | 237           | 1.0 [0.0, 1.0] |

n: number of patients available for analysis

IQR: interquartile range

**Table S3. Biochemical parameters at discharge.**

|                                         | Cholecalciferol group |                      | Control group |                      |
|-----------------------------------------|-----------------------|----------------------|---------------|----------------------|
|                                         | n                     | n=274                | n             | n=269                |
| <b>Laboratory parameters</b>            |                       |                      |               |                      |
| Calcidiol (ng/mL), median [IQR]         | 207                   | 29.0 [20.3, 35.0]    | 187           | 16.4 [11.8, 23.0]    |
| Creatinine (mg/dL), median [IQR]        | 116                   | 0.9 [0.8, 1.0]       | 120           | 0.8 [0.7, 1.0]       |
| CRP (mg/dL), median [IQR]               | 164                   | 1.3 [0.4, 16.2]      | 176           | 1.2 [0.3, 9.6]       |
| Albumin (g/L), median [IQR]             | 84                    | 38.0 [35.0, 40.0]    | 90            | 39.0 [38.0, 41.0]    |
| Haemoglobin (g/dL), median [IQR]        | 123                   | 13.5 [12.6, 14.1]    | 122           | 13.9 [12.6, 14.6]    |
| LDH (U/L), median [IQR]                 | 89                    | 310.0 [195.0, 424.0] | 83            | 283.0 [196.0, 350.0] |
| Leucocytes (No./ $\mu$ L), median [IQR] | 176                   | 7.5 [6.3, 9.2]       | 176           | 7.3 [5.9, 8.8]       |
| Interleukin-6 (pg/mL), median [IQR]     | 62                    | 2.0 [0.9, 13.0]      | 52            | 2.0 [0.5, 6.5]       |
| Ferritin (ng/mL), median [IQR]          | 110                   | 649.4 [340.2, 993.5] | 114           | 535.0 [277.2, 990.2] |
| Calcium (mg/dL), median [IQR]           | 113                   | 9.0 [8.7, 9.3]       | 122           | 9.0 [8.7, 9.3]       |
| Phosphate (mg/dL), median [IQR]         | 77                    | 3.4 [3.0, 4.0]       | 90            | 3.5 [3.0, 3.9]       |

IQR: interquartile range

CRP: C-reactive protein

LDH: Lactate dehydrogenase

**Table S4. Demographic, comorbidities, and serum calcidiol categories at hospital admission**

| Calcidiol levels (ng/mL)               | All patients |                   | ≤10 |                    | 10-15 |                   | 15-20 |                   | 20-25 |                     | >25 |                   | p-value |
|----------------------------------------|--------------|-------------------|-----|--------------------|-------|-------------------|-------|-------------------|-------|---------------------|-----|-------------------|---------|
|                                        | n            | n=538             | n   | n=96               | n     | n=143             | n     | n=124             | n     | n=88                | n   | n=87              |         |
| <b>Demographics</b>                    |              |                   |     |                    |       |                   |       |                   |       |                     |     |                   |         |
| Age (years), median [IQR]              | 538          | 58.0 [46.0, 68.8] | 96  | 62.0 [51.0, 75.2]* | 143   | 57.0 [46.0, 67.0] | 124   | 57.0 [46.0, 67.2] | 88    | 60.0 [47.8, 72.0]** | 87  | 56.0 [43.0, 65.0] | 0.004   |
| Males, n (%)                           | 538          | 349 (64.9)        | 96  | 51 (53.1)          | 143   | 98 (68.5)         | 124   | 86 (69.4)         | 88    | 57 (64.8)           | 87  | 57 (65.5)         | 0.101   |
| BMI (Kg/m <sup>2</sup> ), median [IQR] | 417          | 28.4 [25.7, 31.6] | 62  | 28.7 [25.4, 32.9]  | 114   | 28.8 [26.4, 31.4] | 102   | 28.1 [24.9, 32.3] | 69    | 28.7 [26.8, 31.9]   | 70  | 27.1 [25.3, 29.8] | 0.059   |
| Smokers, n (%)                         | 536          | 59 (11.0)         | 96  | 10 (10.4)          | 143   | 16 (11.2)         | 123   | 18 (14.6)         | 88    | 10 (11.4)           | 86  | 5 (5.8)           | 0.388   |
| <b>Comorbidities</b>                   |              |                   |     |                    |       |                   |       |                   |       |                     |     |                   |         |
| Hypertension, n (%)                    | 538          | 234 (43.5)        | 96  | 49 (51.0)          | 143   | 59 (41.3)         | 124   | 57 (46.0)         | 88    | 40 (45.5)           | 87  | 29 (33.3)         | 0.158   |
| Diabetes, n (%)                        | 538          | 132 (24.5)        | 96  | 27 (28.1)          | 143   | 29 (20.3)         | 124   | 34 (27.4)         | 88    | 25 (28.4)           | 87  | 17 (19.5)         | 0.341   |
| Cardiovascular disease, n (%)          | 538          | 112 (20.8)        | 96  | 27 (28.1)          | 143   | 29 (20.3)         | 124   | 27 (21.8)         | 88    | 17 (19.3)           | 87  | 12 (13.8)         | 0.205   |
| Asthma, n (%)                          | 538          | 28 (5.2)          | 96  | 10 (10.4)          | 143   | 5 (3.5)           | 124   | 7 (5.6)           | 88    | 2 (2.3)             | 87  | 4 (4.6)           | 0.136   |
| COPD, n (%)                            | 538          | 23 (4.3)          | 96  | 6 (6.2)            | 143   | 4 (2.8)           | 124   | 6 (4.8)           | 88    | 4 (4.5)             | 87  | 3 (3.4)           | 0.732   |

Kruskal-Wallis test was used to assess significant differences among the calcidiol categories for numeric variables

Chi-squared or Fisher exact test (frequencies less 5) were used for categorical variables

\* p<0.005, calcidiol ≤10 vs. calcidiol 10-15, 15-20 and >25 ng/mL respectively (Mann-Whitney U test)

\*\* p<0.03, calcidiol 20-25 vs. calcidiol >25 ng/mL (Mann-Whitney U test)

n: number of patients available for analysis

IQR: interquartile range

COPD: Chronic obstructive pulmonary disease

**Table S5. Relevant biochemical parameters and serum calcidiol categories at hospital admission**

| Calcidiol levels (ng/mL)            | All patients |                       | ≤10 |                       | 10-15 |                       | 15-20 |                       | 20-25 |                       | >25 |                       | p-value |
|-------------------------------------|--------------|-----------------------|-----|-----------------------|-------|-----------------------|-------|-----------------------|-------|-----------------------|-----|-----------------------|---------|
|                                     | n            | n=538                 | n   | n=96                  | n     | n=143                 | n     | n=124                 | n     | n=88                  | n   | n=87                  |         |
| <b>Laboratory parameters</b>        |              |                       |     |                       |       |                       |       |                       |       |                       |     |                       |         |
| Calcidiol (ng/mL), median [IQR]     | 538          | 16.6 [11.6, 22.0]     | 96  | 8.0 [6.3, 8.6]        | 143   | 12.9 [11.5, 13.9]     | 124   | 18.0 [16.6, 18.8]     | 88    | 22.0 [21.0, 23.9]     | 87  | 30.0 [27.4, 32.0]     | <0.001  |
| Creatinine (mg/dL), median [IQR]    | 521          | 0.9 [0.8, 1.1]        | 91  | 0.9 [0.7, 1.2]        | 139   | 0.9 [0.7, 1.1]        | 121   | 0.9 [0.8, 1.1]        | 87    | 0.9 [0.8, 1.1]        | 83  | 0.9 [0.8, 1.1]        | 0.434   |
| CRP (mg/dL), median [IQR]           | 477          | 9.4 [3.7, 30.0]       | 85  | 12.5 [3.8, 47.0]      | 128   | 11.7 [3.7, 35.2]      | 108   | 10.1 [4.0, 39.5]      | 79    | 7.7 [3.4, 18.4]       | 77  | 6.3 [3.4, 11.7]       | 0.012   |
| Albumin (g/L), median [IQR]         | 297          | 39.0 [35.0, 41.0]     | 62  | 38.0 [35.0, 40.0]     | 83    | 40.0 [36.0, 41.0]     | 64    | 38.0 [36.0, 40.0]     | 49    | 38.0 [34.0, 40.0]     | 39  | 41.0 [38.5, 42.0]     | 0.003   |
| Haemoglobin (g/dL), median [IQR]    | 527          | 13.9 [13.0, 14.8]     | 92  | 13.5 [12.5, 14.3]     | 139   | 13.8 [12.9, 14.4]     | 124   | 14.0 [12.9, 15.0]     | 87    | 14.0 [13.2, 14.8]     | 85  | 14.3 [13.2, 15.0]     | 0.005   |
| LDH (U/L), median [IQR]             | 440          | 369.0 [248.8, 476.0]  | 76  | 356.0 [260.2, 449.0]  | 118   | 387.5 [280.0, 469.8]  | 101   | 388.0 [254.0, 497.0]  | 74    | 363.0 [234.8, 456.0]  | 71  | 299.0 [168.0, 518.0]  | 0.241   |
| Leucocytes (No./μL), median [IQR]   | 527          | 7.0 [5.3, 9.1]        | 92  | 6.7 [4.8, 9.2]        | 139   | 7.3 [5.6, 9.6]        | 124   | 6.8 [5.3, 8.8]        | 87    | 7.4 [5.8, 9.4]        | 85  | 6.7 [5.0, 8.6]        | 0.279   |
| Interleukin-6 (pg/mL), median [IQR] | 188          | 12.1 [4.6, 27.0]      | 40  | 17.1 [7.0, 47.8]      | 42    | 13.0 [7.0, 21.0]      | 39    | 9.9 [4.2, 28.2]       | 32    | 11.1 [3.5, 25.8]      | 35  | 6.3 [3.6, 19.1]       | 0.096   |
| Ferritin (ng/mL), median [IQR]      | 444          | 650.0 [340.8, 1286.8] | 78  | 675.0 [389.0, 1259.0] | 116   | 634.5 [343.8, 1127.0] | 98    | 685.0 [382.5, 1257.1] | 76    | 679.0 [337.8, 1359.8] | 76  | 529.0 [257.0, 1553.0] | 0.832   |
| Calcium (mg/dL), median [IQR]       | 394          | 8.8 [8.5, 9.1]        | 59  | 8.7 [8.3, 8.9]        | 111   | 8.8 [8.4, 9.1]        | 89    | 8.8 [8.5, 9.1]        | 68    | 8.9 [8.5, 9.2]        | 67  | 8.9 [8.7, 9.2]        | 0.006   |
| Phosphate (mg/dL), median [IQR]     | 310          | 3.3 [2.7, 3.9]        | 37  | 2.9 [2.6, 3.2]        | 76    | 3.0 [2.6, 3.6]        | 72    | 3.3 [2.8, 3.7]        | 63    | 3.5 [3.1, 4.0]        | 62  | 3.4 [3.0, 4.1]        | <0.001  |

Kruskal-Wallis test was used to assess significant differences among the calcidiol categories

n: number of patients available for analysis

IQR: interquartile range

CRP: C-reactive protein

LDH: Lactate dehydrogenase

**Table S6. Relevant biochemical parameters and serum caldiol categories at hospital admission in age-matched patients.**

| Caldioli levels (ng/mL)             | All patients |                       | ≤10 |                       | 10-15 |                       | 15-20 |                       | 20-25 |                       | ≥25 |                       | p-value |
|-------------------------------------|--------------|-----------------------|-----|-----------------------|-------|-----------------------|-------|-----------------------|-------|-----------------------|-----|-----------------------|---------|
|                                     | n            | n=365                 | n   | n=73                  | n     | n=73                  | n     | n=73                  | n     | n=73                  | n   | n=73                  |         |
| <b>Laboratory parameters</b>        |              |                       |     |                       |       |                       |       |                       |       |                       |     |                       |         |
| Calcioli (ng/mL), median [IQR]      | 365          | 18.0 [11.4, 23.9]     | 73  | 8.1 [7.3, 8.9]        | 73    | 12.9 [11.4, 13.9]     | 73    | 18.0 [16.6, 18.9]     | 73    | 22.0 [21.0, 23.9]     | 73  | 29.6 [27.0, 32.0]     | <0.001  |
| Creatinine (mg/dL), median [IQR]    | 353          | 0.9 [0.8, 1.1]        | 71  | 0.9 [0.7, 1.1]        | 71    | 0.9 [0.7, 1.1]        | 70    | 0.9 [0.8, 1.1]        | 72    | 0.9 [0.8, 1.1]        | 69  | 0.9 [0.8, 1.2]        | 0.610   |
| CRP (mg/dL), median [IQR]           | 325          | 8.1 [3.3, 24.0]       | 65  | 15.0 [4.9, 47.0]      | 65    | 8.7 [2.0, 27.0]       | 65    | 8.8 [3.3, 15.1]       | 66    | 6.7 [3.4, 17.0]       | 64  | 6.0 [3.5, 11.6]       | 0.019   |
| Albumin (g/L), median [IQR]         | 203          | 39.0 [36.0, 40.8]     | 48  | 39.0 [36.0, 40.7]     | 43    | 40.0 [36.0, 41.0]     | 39    | 38.0 [36.0, 39.0]     | 41    | 38.0 [34.0, 40.0]     | 32  | 40.0 [37.2, 42.0]     | 0.029   |
| Haemoglobin (g/dL), median [IQR]    | 358          | 13.9 [13.0, 14.7]     | 71  | 13.6 [12.7, 14.2]     | 71    | 13.8 [13.0, 14.4]     | 73    | 14.0 [12.9, 14.8]     | 72    | 14.0 [13.4, 14.8]     | 71  | 14.3 [13.2, 14.9]     | 0.058   |
| LDH (U/L), median [IQR]             | 300          | 357.5 [246.8, 474.8]  | 63  | 371.0 [298.0, 473.5]  | 60    | 383.0 [276.5, 455.2]  | 59    | 312.0 [220.5, 510.5]  | 60    | 358.5 [226.0, 458.5]  | 58  | 318.0 [200.0, 528.0]  | 0.668   |
| Leucocytes (No./μL), median [IQR]   | 358          | 6.9 [5.1, 9.0]        | 71  | 6.8 [4.8, 9.7]        | 71    | 7.5 [5.4, 9.6]        | 73    | 6.6 [5.0, 9.0]        | 72    | 7.3 [5.2, 9.0]        | 71  | 6.7 [5.0, 8.3]        | 0.568   |
| Interleukin-6 (pg/mL), median [IQR] | 141          | 12.1 [4.0, 27.0]      | 28  | 17.1 [7.0, 43.2]      | 27    | 13.0 [6.0, 20.0]      | 29    | 11.2 [4.0, 33.8]      | 28    | 12.6 [3.1, 26.2]      | 29  | 7.4 [3.9, 21.0]       | 0.369   |
| Ferritin (ng/mL), median [IQR]      | 307          | 688.0 [342.2, 1318.0] | 60  | 723.5 [423.2, 1494.8] | 60    | 648.0 [378.6, 1109.0] | 60    | 741.6 [374.5, 1144.5] | 63    | 708.0 [344.7, 1340.5] | 64  | 595.0 [272.8, 1645.5] | 0.898   |
| Calcium (mg/dL), median [IQR]       | 273          | 8.8 [8.5, 9.1]        | 49  | 8.7 [8.3, 8.9]        | 59    | 8.8 [8.4, 9.1]        | 53    | 8.8 [8.5, 9.0]        | 56    | 8.9 [8.5, 9.2]        | 56  | 8.9 [8.6, 9.2]        | 0.048   |
| Phosphate (mg/dL), median [IQR]     | 224          | 3.3 [2.8, 3.8]        | 29  | 3.0 [2.6, 3.2]        | 44    | 3.2 [2.7, 3.6]        | 47    | 3.2 [2.7, 3.7]        | 52    | 3.5 [3.1, 3.9]        | 52  | 3.3 [2.8, 4.0]        | 0.017   |

Kruskal-Wallis test was used to assess significant differences among the caldioli categories

n: number of patients available for analysis

IQR: interquartile range

CRP: C-reactive protein

LDH: Lactate dehydrogenase

**Table S7. Pulmonary involvement at admission and outcomes according to serum calcdiol categories.**

| Calcdiol levels (ng/mL)                           | All patients |                 | ≤10      |                 | 10-15    |                 | 15-20    |                 | 20-25    |                 | >25      |                 |
|---------------------------------------------------|--------------|-----------------|----------|-----------------|----------|-----------------|----------|-----------------|----------|-----------------|----------|-----------------|
| <b>ALL PATIENTS</b>                               | <b>n</b>     | <b>n=538</b>    | <b>n</b> | <b>n=96</b>     | <b>n</b> | <b>n=143</b>    | <b>n</b> | <b>n=124</b>    | <b>n</b> | <b>n=88</b>     | <b>n</b> | <b>n=87</b>     |
| <b>Pulmonary involvement, %[95% CI]*</b>          | 538          | 82.9[79.4-85.9] | 96       | 92.7[85.1-96.8] | 143      | 84.6[77.4-89.9] | 124      | 80.6[72.4-87.0] | 88       | 85.2[75.7-91.6] | 87       | 70.1[59.2-79.2] |
| <b>Outcomes</b>                                   |              |                 |          |                 |          |                 |          |                 |          |                 |          |                 |
| Length of hospitalization (days), median [95% CI] | 502          | 9.5[9.0-10.0]   | 86       | 11.5[10.0-13.5] | 139      | 9.5[8.5-10.5]   | 112      | 9.5[8.5-10.5]   | 84       | 9.0[8.0-10.5]   | 81       | 9.5[8.5-10.5]   |
| Admission to ICU, %[95% CI]                       | 538          | 16.7[13.7-20.2] | 96       | 24.0[16.1-34.0] | 143      | 16.8[11.3-24.1] | 124      | 18.5[12.4-26.7] | 88       | 14.8[8.4-24.3]  | 87       | 8.0[3.6-16.4]   |
| Death, %[95% CI]                                  | 538          | 6.7[4.8-9.2]    | 96       | 10.4[5.4-18.7]  | 143      | 2.8[0.9-7.5]    | 124      | 9.7[5.3-16.6]   | 88       | 4.5[1.5-11.9]   | 87       | 6.9[2.8-15.0]   |
| <b>AGE-MATCHED PATIENTS</b>                       | <b>n</b>     | <b>n=365</b>    | <b>n</b> | <b>n=73</b>     | <b>n</b> | <b>n=73</b>     | <b>n</b> | <b>n=73</b>     | <b>n</b> | <b>n=73</b>     | <b>n</b> | <b>n=73</b>     |
| <b>Pulmonary involvement, %[95% CI]*</b>          | 365          | 85.8[81.6-89.1] | 73       | 91.8[82.4-96.6] | 73       | 87.7[77.4-93.9] | 73       | 89.0[79.0-94.8] | 73       | 89.0[79.0-94.8] | 73       | 71.2[59.3-80.9] |
| <b>Outcomes</b>                                   |              |                 |          |                 |          |                 |          |                 |          |                 |          |                 |
| Length of hospitalization (days), median [95% CI] | 340          | 9.5[9.0-10.0]   | 66       | 11.5[10.0-14.0] | 71       | 9.5[8.0-11.0]   | 67       | 9.0[8.0-10.5]   | 69       | 9.0[7.5-11.0]   | 67       | 9.5[8.5-10.5]   |
| Admission to ICU, %[95% CI]                       | 365          | 17.3[13.6-21.6] | 73       | 28.8[19.1-40.7] | 73       | 15.1[8.1-25.8]  | 73       | 20.5[12.3-31.9] | 73       | 13.7[7.1-24.2]  | 73       | 8.2[3.4-17.6]   |
| Death, %[95% CI]                                  | 365          | 6.8[4.6-10.1]   | 73       | 9.6[4.3-19.3]   | 73       | 2.7[0.5-10.4]   | 73       | 8.2[3.4-17.6]   | 73       | 5.5[1.8-14.2]   | 73       | 8.2[3.4-17.6]   |

n: number of patients available for analysis

ICU: intensive care unit

\*Assessed by chest X-ray and/or computed axial tomography



**Table S8. Types and number of drugs received during the hospitalization and serum calcdiol categories at hospital admission.**

| Calcdiol levels (ng/mL)                    | All patients |                | ≤10 |                | 10-15 |                | 15-20 |                | 20-25 |                | >25 |                | p-value |
|--------------------------------------------|--------------|----------------|-----|----------------|-------|----------------|-------|----------------|-------|----------------|-----|----------------|---------|
|                                            | n            | n=538          | n   | n=96           | n     | n=143          | n     | n=124          | n     | n=88           | n   | n=87           |         |
| <b>Drugs prescribed</b>                    |              |                |     |                |       |                |       |                |       |                |     |                |         |
| Cholecalciferol, n (%)                     | 538          | 273 (50.7)     | 96  | 48 (50.0)      | 143   | 69 (48.3)      | 124   | 65 (52.4)      | 88    | 51 (58.0)      | 87  | 40 (46.0)      | 0.535   |
| Enoxaparin, n (%)                          | 529          | 396 (74.9)     | 92  | 74 (80.4)      | 141   | 110 (78.0)     | 122   | 88 (72.1)      | 87    | 68 (78.2)      | 87  | 56 (64.4)      | 0.080   |
| Ceftriaxone, n (%)                         | 530          | 191 (36.0)     | 92  | 39 (42.4)      | 141   | 47 (33.3)      | 123   | 49 (39.8)      | 87    | 30 (34.5)      | 87  | 26 (29.9)      | 0.361   |
| Methylprednisolone, n (%)                  | 531          | 191 (36.0)     | 92  | 37 (40.2)      | 141   | 42 (29.8)      | 123   | 44 (35.8)      | 88    | 28 (31.8)      | 87  | 40 (46.0)      | 0.112   |
| Azithromycin, n (%)                        | 532          | 183 (34.4)     | 92  | 39 (42.4)      | 141   | 39 (27.7)      | 124   | 39 (31.5)      | 88    | 29 (33.0)      | 87  | 37 (42.5)      | 0.073   |
| Dexamethasone, n (%)                       | 532          | 161 (30.3)     | 92  | 24 (26.1)      | 141   | 48 (34.0)      | 124   | 37 (29.8)      | 88    | 22 (25.0)      | 87  | 30 (34.5)      | 0.461   |
| Number of drugs per patient, median [IQR]* | 532          | 3.0 [2.0, 4.0] | 92  | 3.0 [2.0, 4.0] | 141   | 3.0 [2.0, 4.0] | 124   | 3.0 [2.0, 4.0] | 88    | 3.0 [2.0, 4.0] | 87  | 3.0 [2.0, 4.0] | 0.200   |

Kruskal-Wallis test was used to assess significant differences among the calcdiol categories for numeric variables

Chi-squared or Fisher exact test (frequencies less 5) were used for categorical variables

n: number of patients available for analysis

IQR: interquartile range

\*Includes cholecalciferol

**Table S9. Demographic, comorbidities, and serum caldiol categories at admission in age-matched patients.**

| Caldiol levels (ng/mL)                 | All patients |                   | ≤10 |                   | 10-15 |                   | 15-20 |                   | 20-25 |                   | >25 |                   | p-value |
|----------------------------------------|--------------|-------------------|-----|-------------------|-------|-------------------|-------|-------------------|-------|-------------------|-----|-------------------|---------|
|                                        | n            | n=365             | n   | n=73              | n     | n=73              | n     | n=73              | n     | n=73              | n   | n=73              |         |
| <b>Demographics</b>                    |              |                   |     |                   |       |                   |       |                   |       |                   |     |                   |         |
| Age (years), median [IQR]              | 365          | 58.0 [50.0, 67.0] | 73  | 58.0 [50.0, 66.0] | 73    | 57.0 [51.0, 67.0] | 73    | 57.0 [51.0, 67.0] | 73    | 59.0 [48.0, 69.0] | 73  | 58.0 [51.0, 67.0] | 0.990   |
| Males, n (%)                           | 365          | 227 (62.2)        | 73  | 35 (47.9)         | 73    | 49 (67.1)         | 73    | 50 (68.5)         | 73    | 47 (64.4)         | 73  | 46 (63.0)         | 0.076   |
| BMI (Kg/m <sup>2</sup> ), median [IQR] | 280          | 28.7 [26.0, 32.0] | 50  | 28.9 [26.5, 32.9] | 58    | 29.2 [26.8, 32.1] | 59    | 28.7 [24.9, 32.9] | 56    | 28.8 [26.8, 31.9] | 57  | 27.7 [25.2, 29.9] | 0.063   |
| Smokers, n (%)                         | 363          | 37 (10.2)         | 73  | 9 (12.3)          | 73    | 6 (8.2)           | 72    | 10 (13.9)         | 73    | 9 (12.3)          | 72  | 3 (4.2)           | 0.250   |
| <b>Comorbidities</b>                   |              |                   |     |                   |       |                   |       |                   |       |                   |     |                   |         |
| Hypertension, n (%)                    | 365          | 157 (43.0)        | 73  | 35 (47.9)         | 73    | 32 (43.8)         | 73    | 35 (47.9)         | 73    | 29 (39.7)         | 73  | 26 (35.6)         | 0.490   |
| Diabetes, n (%)                        | 365          | 92 (25.2)         | 73  | 22 (30.1)         | 73    | 17 (23.3)         | 73    | 19 (26.0)         | 73    | 18 (24.7)         | 73  | 16 (21.9)         | 0.819   |
| Cardiovascular disease, n (%)          | 365          | 70 (19.2)         | 73  | 14 (19.2)         | 73    | 17 (23.3)         | 73    | 17 (23.3)         | 73    | 10 (13.7)         | 73  | 12 (16.4)         | 0.500   |
| Asthma, n (%)                          | 365          | 15 (4.1)          | 73  | 8 (11.0)          | 73    | 1 (1.4)           | 73    | 2 (2.7)           | 73    | 2 (2.7)           | 73  | 2 (2.7)           | 0.067   |
| COPD, n (%)                            | 365          | 16 (4.4)          | 73  | 2 (2.7)           | 73    | 3 (4.1)           | 73    | 4 (5.5)           | 73    | 4 (5.5)           | 73  | 3 (4.1)           | 0.976   |

Kruskal-Wallis test was used to assess significant differences among the caldiol categories for numeric variables

Chi-squared or Fisher exact test (frequencies less 5) were used for categorical variables

n: number of patients available for analysis

IQR: interquartile range

COPD: Chronic obstructive pulmonary disease

**Table S10. Types and number of drugs received during the hospitalization and serum calcidiol categories at hospital admission in age-matched patients.**

| Calcidiol levels (ng/mL)                   | All patients |                | ≤10 |                | 10-15 |                | 15-20 |                | 20-25 |                | >25 |                | p-value |
|--------------------------------------------|--------------|----------------|-----|----------------|-------|----------------|-------|----------------|-------|----------------|-----|----------------|---------|
|                                            | n            | n=538          | n   | n=96           | n     | n=143          | n     | n=124          | n     | n=88           | n   | n=87           |         |
| <b>Drugs prescribed</b>                    |              |                |     |                |       |                |       |                |       |                |     |                |         |
| Cholecalciferol, n (%)                     | 538          | 273 (50.7)     | 96  | 48 (50.0)      | 143   | 69 (48.3)      | 124   | 65 (52.4)      | 88    | 51 (58.0)      | 87  | 40 (46.0)      | 0.535   |
| Enoxaparin, n (%)                          | 529          | 396 (74.9)     | 92  | 74 (80.4)      | 141   | 110 (78.0)     | 122   | 88 (72.1)      | 87    | 68 (78.2)      | 87  | 56 (64.4)      | 0.080   |
| Ceftriaxone, n (%)                         | 530          | 191 (36.0)     | 92  | 39 (42.4)      | 141   | 47 (33.3)      | 123   | 49 (39.8)      | 87    | 30 (34.5)      | 87  | 26 (29.9)      | 0.361   |
| Methylprednisolone, n (%)                  | 531          | 191 (36.0)     | 92  | 37 (40.2)      | 141   | 42 (29.8)      | 123   | 44 (35.8)      | 88    | 28 (31.8)      | 87  | 40 (46.0)      | 0.112   |
| Azithromycin, n (%)                        | 532          | 183 (34.4)     | 92  | 39 (42.4)      | 141   | 39 (27.7)      | 124   | 39 (31.5)      | 88    | 29 (33.0)      | 87  | 37 (42.5)      | 0.073   |
| Dexamethasone, n (%)                       | 532          | 161 (30.3)     | 92  | 24 (26.1)      | 141   | 48 (34.0)      | 124   | 37 (29.8)      | 88    | 22 (25.0)      | 87  | 30 (34.5)      | 0.461   |
| Number of drugs per patient, median [IQR]* | 532          | 3.0 [2.0, 4.0] | 92  | 3.0 [2.0, 4.0] | 141   | 3.0 [2.0, 4.0] | 124   | 3.0 [2.0, 4.0] | 88    | 3.0 [2.0, 4.0] | 87  | 3.0 [2.0, 4.0] | 0.200   |

Kruskal-Wallis test was used to assess significant differences among the calcidiol categories for numeric variables

Chi-squared or Fisher exact test (frequencies less 5) were used for categorical variables

n: number of patients available for analysis

IQR: interquartile range

\*Includes cholecalciferol

**Table S11. Relevant biochemical parameters and serum calcidiol categories at hospital admission in the control group (No cholecalciferol).**

| Calcidiol levels (ng/mL)            | All patients |                       | ≤10 |                       | 10-15 |                      | 15-20 |                       | 20-25 |                       | ≥25 |                      | p-value |
|-------------------------------------|--------------|-----------------------|-----|-----------------------|-------|----------------------|-------|-----------------------|-------|-----------------------|-----|----------------------|---------|
|                                     | n            | n=265                 | n   | n=48                  | n     | n=74                 | n     | n=59                  | n     | n=37                  | n   | n=47                 |         |
| <b>Laboratory parameters</b>        |              |                       |     |                       |       |                      |       |                       |       |                       |     |                      |         |
| Calcidiol (ng/mL), median [IQR]     | 265          | 16.1 [11.5, 22.0]     | 48  | 8.0 [7.0, 8.5]        | 74    | 13.0 [11.5, 13.9]    | 59    | 17.8 [16.6, 18.4]     | 37    | 22.0 [21.1, 24.0]     | 47  | 30.0 [27.6, 32.0]    | <0.001  |
| Creatinine (mg/dL), median [IQR]    | 253          | 0.9 [0.8, 1.1]        | 44  | 0.9 [0.7, 1.1]        | 71    | 0.9 [0.7, 1.1]       | 57    | 0.9 [0.8, 1.1]        | 37    | 0.9 [0.8, 1.1]        | 44  | 0.9 [0.8, 1.2]       | 0.861   |
| CRP (mg/dL), median [IQR]           | 236          | 8.7 [3.3, 25.0]       | 39  | 15.0 [3.8, 55.5]      | 66    | 14.2 [2.3, 42.8]     | 53    | 9.7 [3.0, 23.0]       | 35    | 6.6 [2.7, 11.9]       | 43  | 6.3 [4.5, 9.9]       | 0.017   |
| Albumin (g/L), median [IQR]         | 143          | 39.0 [36.6, 41.0]     | 26  | 39.0 [36.2, 40.0]     | 42    | 40.0 [38.2, 41.8]    | 29    | 38.0 [36.0, 39.0]     | 24    | 38.0 [35.8, 39.2]     | 22  | 41.0 [40.0, 42.0]    | 0.003   |
| Haemoglobin (g/dL), median [IQR]    | 258          | 14.0 [13.0, 14.9]     | 45  | 13.5 [12.7, 14.3]     | 71    | 14.0 [13.0, 14.6]    | 59    | 14.2 [12.7, 15.0]     | 37    | 14.0 [13.4, 14.9]     | 46  | 14.4 [13.6, 15.1]    | 0.027   |
| LDH (U/L), median [IQR]             | 212          | 347.0 [243.0, 461.0]  | 35  | 390.0 [298.0, 522.0]  | 61    | 384.0 [255.0, 476.0] | 47    | 390.0 [280.5, 464.5]  | 30    | 274.5 [194.8, 376.2]  | 39  | 291.0 [93.5, 421.5]  | 0.006   |
| Leucocytes (No./μL), median [IQR]   | 258          | 7.0 [5.1, 8.9]        | 45  | 7.5 [5.0, 10.5]       | 71    | 7.5 [5.6, 9.4]       | 59    | 6.8 [5.2, 8.2]        | 37    | 6.8 [5.1, 8.9]        | 46  | 6.7 [4.9, 8.7]       | 0.726   |
| Interleukin-6 (pg/mL), median [IQR] | 91           | 11.0 [3.8, 24.9]      | 16  | 19.5 [7.0, 51.0]      | 17    | 13.0 [6.1, 21.1]     | 18    | 8.9 [3.8, 25.2]       | 18    | 14.7 [3.4, 25.3]      | 22  | 5.7 [3.2, 12.1]      | 0.205   |
| Ferritin (ng/mL), median [IQR]      | 216          | 584.0 [302.8, 1108.5] | 39  | 650.0 [305.5, 1151.0] | 56    | 465.0 [292.2, 872.5] | 45    | 793.0 [453.0, 1300.0] | 33    | 514.0 [231.0, 1166.0] | 43  | 452.0 [297.0, 917.5] | 0.156   |
| Calcium (mg/dL), median [IQR]       | 190          | 8.9 [8.5, 9.1]        | 29  | 8.6 [8.3, 8.9]        | 58    | 8.9 [8.6, 9.1]       | 44    | 8.8 [8.5, 9.1]        | 25    | 9.1 [8.9, 9.3]        | 34  | 8.9 [8.7, 9.2]       | 0.004   |
| Phosphate (mg/dL), median [IQR]     | 149          | 3.2 [2.7, 3.8]        | 21  | 2.9 [2.6, 3.1]        | 36    | 3.0 [2.6, 3.5]       | 33    | 3.3 [3.1, 3.6]        | 24    | 3.6 [3.1, 4.0]        | 35  | 3.7 [3.0, 4.1]       | 0.004   |

Kruskal-Wallis test was used to assess significant differences among the calcidiol categories

n: number of patients available for analysis

IQR: interquartile range

CRP: C-reactive protein

LDH: Lactate dehydrogenase

**Table S12. Types and number of drugs received during the hospitalization and serum calcidiol categories at hospital admission in the control group (No cholecalciferol).**

| Calcidiol levels (ng/mL)                   | All patients |                | ≤10 |                | 10-15 |                | 15-20 |                | 20-25 |                | >25 |                | p-value |
|--------------------------------------------|--------------|----------------|-----|----------------|-------|----------------|-------|----------------|-------|----------------|-----|----------------|---------|
|                                            | n            | n=265          | n   | n=48           | n     | n=74           | n     | n=59           | n     | n=37           | n   | n=47           |         |
| <b>Drugs prescribed</b>                    |              |                |     |                |       |                |       |                |       |                |     |                |         |
| Cholecalciferol, n (%)                     | 265          | 0 (0.0)        | 48  | 0 (0.0)        | 74    | 0 (0.0)        | 59    | 0 (0.0)        | 37    | 0 (0.0)        | 47  | 0 (0.0)        | –       |
| Enoxaparin, n (%)                          | 260          | 187 (71.9)     | 45  | 33 (73.3)      | 73    | 54 (74.0)      | 58    | 45 (77.6)      | 37    | 28 (75.7)      | 47  | 27 (57.4)      | 0.181   |
| Ceftriaxone, n (%)                         | 260          | 92 (35.4)      | 45  | 18 (40.0)      | 73    | 24 (32.9)      | 58    | 19 (32.8)      | 37    | 15 (40.5)      | 47  | 16 (34.0)      | 0.868   |
| Methylprednisolone, n (%)                  | 261          | 92 (35.2)      | 45  | 17 (37.8)      | 73    | 22 (30.1)      | 59    | 21 (35.6)      | 37    | 11 (29.7)      | 47  | 21 (44.7)      | 0.510   |
| Azithromycin, n (%)                        | 261          | 95 (36.4)      | 45  | 19 (42.2)      | 73    | 20 (27.4)      | 59    | 16 (27.1)      | 37    | 16 (43.2)      | 47  | 24 (51.1)      | 0.032   |
| Dexamethasone, n (%)                       | 261          | 78 (29.9)      | 45  | 14 (31.1)      | 73    | 20 (27.4)      | 59    | 20 (33.9)      | 37    | 9 (24.3)       | 47  | 15 (31.9)      | 0.855   |
| Number of drugs per patient, median [IQR]* | 261          | 3.0 [3.0, 4.0] | 45  | 4.0 [3.0, 5.0] | 73    | 3.0 [2.0, 4.0] | 59    | 3.0 [3.0, 4.0] | 37    | 4.0 [3.0, 4.0] | 47  | 3.0 [3.0, 4.0] | 0.379   |

Kruskal-Wallis test was used to assess significant differences among the calcidiol categories for numeric variables

Chi-squared or Fisher exact test (frequencies less 5) were used for categorical variables

n: number of patients available for analysis

IQR: interquartile range

\*Includes cholecalciferol

**Table S13. Pulmonary involvement at admission and outcomes according to initial serum calcidiol categories in the control group (No cholecalciferol).**

| Calcidiol levels (ng/mL)                          | All patients |                 | ≤10 |                 | 10-15 |                 | 15-20 |                 | 20-25 |                 | >25 |                 |
|---------------------------------------------------|--------------|-----------------|-----|-----------------|-------|-----------------|-------|-----------------|-------|-----------------|-----|-----------------|
|                                                   | n            | n=265           | n   | n=48            | n     | n=74            | n     | n=59            | n     | n=37            | n   | n=47            |
| <b>Pulmonary involvement, % [95% CI]*</b>         | 265          | 80.4[75.0-84.9] | 48  | 91.7[79.1-97.3] | 74    | 82.4[71.5-90.0] | 59    | 79.7[66.8-88.6] | 37    | 83.8[67.3-93.2] | 47  | 63.8[48.5-76.9] |
| <b>Outcomes</b>                                   |              |                 |     |                 |       |                 |       |                 |       |                 |     |                 |
| Length of hospitalization (days), median [95% CI] | 251          | 9.5[9.0-10.0]   | 42  | 11.5[9.5-14.5]  | 74    | 9.0[8.0-10.5]   | 54    | 9.0[8.0-10.5]   | 37    | 8.5[7.0-10.0]   | 44  | 10.0[8.5-11.0]  |
| Admission to ICU, % [95% CI]                      | 265          | 16.2[12.1-21.3] | 48  | 22.9[12.5-37.7] | 74    | 18.9[11.1-30.0] | 59    | 22.0[12.7-35.1] | 37    | 5.4[0.9-19.5]   | 47  | 6.4[1.7-18.6]   |
| Death, % [95% CI]                                 | 265          | 5.3[3.0-8.9]    | 48  | 12.5[5.2-25.9]  | 74    | 0.0[0.0-6.1]    | 59    | 8.5[3.2-19.4]   | 37    | 0.0[0.0-11.7]   | 47  | 6.4[1.7-18.6]   |

n: number of patients available for analysis

ICU: intensive care unit

\*Assessed by chest X-ray and/or computed axial tomography
