# Supplementary material
Source: PubMed Central journal article supplement (PMC8855603)
Supplement: 12916_2022_2290_MOESM3_ESM.pdf [file 12916_2022_2290_MOESM3_ESM.pdf]

## **ADDITIONAL FILE 3 COVID-VIT-D**

**A single oral dose bolus of 100,000 IU of cholecalciferol at hospital admission did not improve outcomes in the COVID-19 disease. The COVID-VIT-D: A randomized multicentre international clinical trial.**

### **TABLE OF CONTENTS**

**- COVID-VIT-D collaborators and affiliations.**

**COVID-VIT-D collaborators and affiliations.**

| COUNTRY   | NUMBER OF PATIENTS | CENTRE                                                                                                       | COLLABORATOR                                                                                                                                                                                                                                                                                                                                                                                                                                                                                                                                                                                                                                                                                                                                                                       |
|-----------|--------------------|--------------------------------------------------------------------------------------------------------------|------------------------------------------------------------------------------------------------------------------------------------------------------------------------------------------------------------------------------------------------------------------------------------------------------------------------------------------------------------------------------------------------------------------------------------------------------------------------------------------------------------------------------------------------------------------------------------------------------------------------------------------------------------------------------------------------------------------------------------------------------------------------------------|
| SPAIN     | 176                | Hospital Universitario Central de Asturias (HUCA). Oviedo.                                                   | Alonso Montes, Cristina <sup>1,2,3</sup><br>Álvarez Ramos, Belén <sup>1,2</sup><br>Avello Llano, Noelia <sup>1</sup><br>Díaz López, Bernardino <sup>1</sup><br>Fernández Villabrille, Sara <sup>1,2,3,4</sup><br>García Gil-Albert, Carmen <sup>1</sup><br>García Lamigueiro, Carolina <sup>1</sup><br>González Franco, Álvaro <sup>1</sup><br>Gutiérrez Alcalá, Octavio <sup>1</sup><br>Gutiérrez Rodríguez, José <sup>2,5</sup><br>Lobo Cortizo, Isabel <sup>1</sup><br>Martín Carro, Beatriz <sup>1,2,3,4</sup><br>Martín Vírgala, Julia <sup>1,2,3,4</sup><br>Martínez Arias, Laura <sup>1,2,4</sup><br>Prieto García, María Belén <sup>1</sup><br>Prieto Piquero, Eugenia <sup>1</sup><br>Rodríguez Carrio, Javier <sup>2,3,4</sup><br>Vázquez Fernández, Carlos <sup>1</sup> |
|           |                    | Hospital Universitario San Agustín. Avilés.                                                                  | de Zárraga Fernández, Miguel Alberto <sup>6</sup><br>Tarrazo Tarrazo, Carlos <sup>6</sup>                                                                                                                                                                                                                                                                                                                                                                                                                                                                                                                                                                                                                                                                                          |
|           |                    | Hospital universitario El Bierzo. Ponferrada.                                                                | de Alba García, Paula <sup>7</sup><br>Fernández Crespo, Silvia <sup>7</sup><br>Fernández García, Carolina <sup>7</sup>                                                                                                                                                                                                                                                                                                                                                                                                                                                                                                                                                                                                                                                             |
|           |                    | Hospital Lucus Augusti. Lugo.                                                                                | Ayuso García, Blanca <sup>8</sup>                                                                                                                                                                                                                                                                                                                                                                                                                                                                                                                                                                                                                                                                                                                                                  |
| ARGENTINA | 297                | Hospital Privado Universitario de Córdoba y Hospital Raúl Ángel Ferreyra. Córdoba.                           | Alaye, María Luján <sup>9,10</sup><br>Albertini, Ricardo <sup>9,10,11</sup><br>Caeiro, Juan Pablo <sup>9</sup><br>Capra, Raúl Horacio <sup>9</sup><br>Garay, María Gabriela <sup>9</sup><br>Saad, Emanuel José <sup>9,10,11</sup>                                                                                                                                                                                                                                                                                                                                                                                                                                                                                                                                                  |
|           |                    | Hospital Militar Central Cirujano Mayor Dr. Cosme Algerich. Buenos Aires.                                    | López Martínez, Martín Nicolás <sup>12</sup><br>Sánchez, Yamila Elizabeth <sup>12</sup><br>Stessens, Maria Aline <sup>12</sup>                                                                                                                                                                                                                                                                                                                                                                                                                                                                                                                                                                                                                                                     |
|           |                    | Hospital Independencia. Santiago del Estero.                                                                 | Agüero, Javier <sup>13</sup><br>Cejas, Raúl <sup>13</sup><br>Dorado, Andrea <sup>13</sup><br>Secco, Pablo <sup>13</sup><br>Vechetti, Guillermo <sup>13</sup><br>Vergara, Ramón <sup>13</sup>                                                                                                                                                                                                                                                                                                                                                                                                                                                                                                                                                                                       |
|           |                    | Hospital Julio C. Perrando. Resistencia.                                                                     | Díaz, Rafael <sup>14</sup><br>Ramírez Farías, Rocío <sup>14</sup>                                                                                                                                                                                                                                                                                                                                                                                                                                                                                                                                                                                                                                                                                                                  |
|           |                    | Instituto de Nefrología Pergamino SRL. Pergamino.                                                            | Díaz, Romina <sup>15</sup><br>Guerrero, María Paula <sup>15</sup>                                                                                                                                                                                                                                                                                                                                                                                                                                                                                                                                                                                                                                                                                                                  |
| GUATEMALA | 47                 | Hospital General de Enfermedades del Instituto Guatemalteco de Seguridad Social (IGSS). Ciudad de Guatemala. | Ávalos, Lester <sup>16</sup><br>Cipriano Maldonado, Ever <sup>16</sup><br>Loaiza Espinales, José <sup>16</sup>                                                                                                                                                                                                                                                                                                                                                                                                                                                                                                                                                                                                                                                                     |
| CHILE     | 28                 | Hospital Barros Luco Trudeau. Santiago.                                                                      | Gacitúa Meneses, Ignacio <sup>17,18</sup><br>Villalobos Navarro, Arturo <sup>17,18</sup>                                                                                                                                                                                                                                                                                                                                                                                                                                                                                                                                                                                                                                                                                           |

## **Collaborators affiliations:**

- <sup>1</sup> Hospital Universitario Central de Asturias (HUCA), Oviedo, España.
- <sup>2</sup> Instituto de Investigación Sanitaria del Principado de Asturias (ISPA), Oviedo, España.
- <sup>3</sup> Retic REDinREN-ISCIH
- <sup>4</sup> Universidad de Oviedo, Oviedo, España.
- <sup>5</sup> Hospital Monte Naranco, Oviedo, España.
- <sup>6</sup> Hospital Universitario San Agustín (HUSA), Avilés, España.
- <sup>7</sup> Hospital Universitario El Bierzo, Ponferrada, España.
- <sup>8</sup> Hospital Lucus Augusti, Lugo, España.
- <sup>9</sup> Hospital Privado Universitario de Córdoba, Córdoba, Argentina.
- <sup>10</sup> Hospital Raúl Ángel Ferreyra, Córdoba, Argentina.
- <sup>11</sup> Instituto Universitario de Ciencias Biomédicas de Córdoba (IUCBC), Córdoba, Argentina.
- <sup>12</sup> Hospital Militar Central Cirujano Mayor Dr. Cosme Argerich, Buenos Aires, Argentina.
- <sup>13</sup> Hospital Independencia, Santiago del Estero, Argentina.
- <sup>14</sup> Hospital Julio C. Perrando, Resistencia, Argentina.
- <sup>15</sup> Instituto de Nefrología Pergamino SRL, Pergamino, Argentina.
- <sup>16</sup> Hospital General de Enfermedades del Instituto Guatemalteco de Seguridad Social (IGSS), Ciudad de Guatemala, Guatemala.
- <sup>17</sup> Hospital Barros Luco Trudeau, Santiago, Chile.
- <sup>18</sup> Universidad de Chile, Santiago, Chile.
